# Supplementary material
Source: HighWire-hosted journal article supplement (https://jnm.snmjournals.org/highwire/filestream/95386/field_highwire_adjunct_files/0/204156_Supplemental_Data.pdf)
Supplement: 204156_Supplemental_Data.pdf [file 204156_Supplemental_Data.pdf]

To give an idea of the tracer uptake in the bladder and the vertebrae, supplemental figure 1 shows the bladder to liver and the vertebra to liver ratios for all patients in our patient database. These ratios were obtained from the reference MLEM reconstructions (CT-based attenuation correction). Supplemental figure 2 shows a histogram of the high activity lesions classified based on their tumor to liver ratios that were used to analyze differences between MLRR/MLAA and MLEM as shown in figure 6.

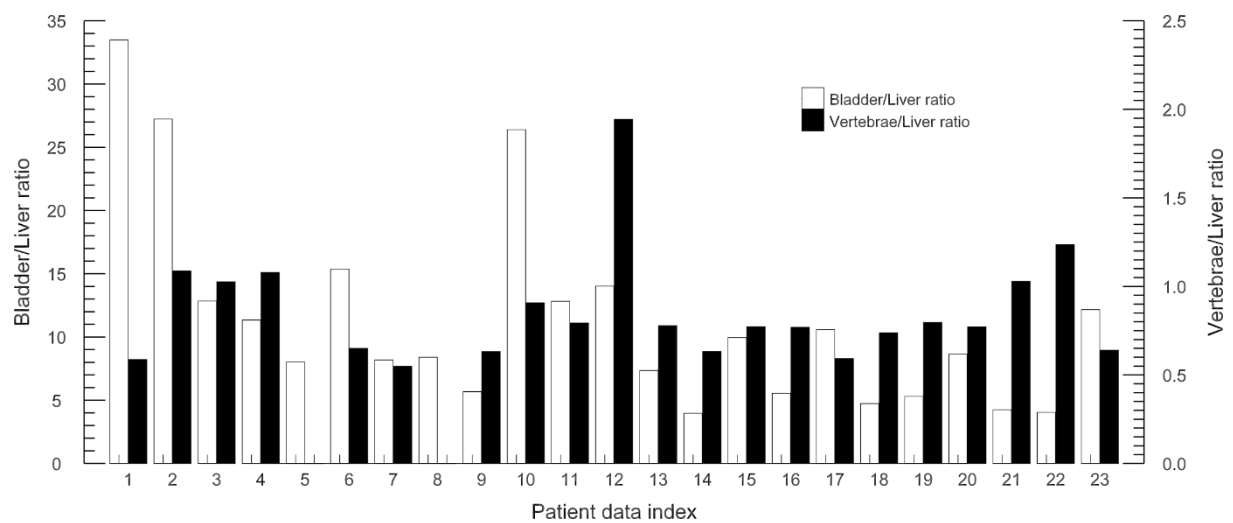

Supplemental Figure 1: Bladder to liver and vertebra to liver ratios computed as the average activity inside the segmented bladder and vertebra regions to the average activity inside the liver.

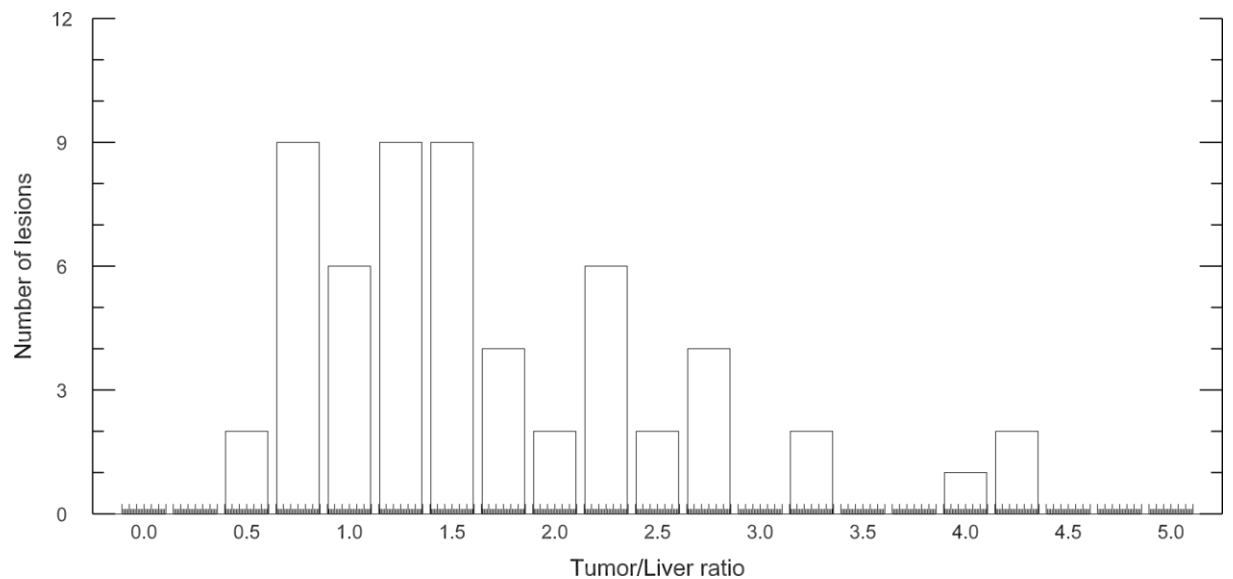

Supplemental Figure 2: Histogram of the tumors classified by their tumor to liver ratio.
